# Supplementary material for: Second-Tier Next Generation Sequencing Integrated in Nationwide Newborn Screening Provides Rapid Molecular Diagnostics of Severe Combined Immunodeficiency
Source: PubMed Central journal article supplement (PMC7381310; doi:10.3389/fimmu.2020.01417), 2020-07-09
Supplement: Table_1.pdf [file Table_1.pdf]

**Supplemental Table S1 | New SCIDs and severe T cell deficiencies detected in the pilot project.**

| Patient ID                                          | SCID_1                                       | SCID_2                                                                                                                                 | SCID_3                                                                                        | Age matched references        |
|-----------------------------------------------------|----------------------------------------------|----------------------------------------------------------------------------------------------------------------------------------------|-----------------------------------------------------------------------------------------------|-------------------------------|
| Symptoms at time of diagnosis                       | Healthy                                      | Healthy                                                                                                                                | Skeletal dysplasia, total Hirschsprung                                                        |                               |
| Gender                                              | Male                                         | Male                                                                                                                                   | Female                                                                                        |                               |
| GA w                                                | 42                                           | 41                                                                                                                                     | 37                                                                                            |                               |
| BW g                                                | 3592                                         | 3588                                                                                                                                   | 2152                                                                                          |                               |
| TRECs/ $\mu$ l Initial NBS                          | 0.48                                         | 3.8 - 18.2 - 7.2                                                                                                                       | 0                                                                                             |                               |
| DBS sample collected                                | Day 3                                        | Day 3                                                                                                                                  | Day 3                                                                                         |                               |
| Received NBS lab                                    | Day 4                                        | Day 6                                                                                                                                  | Day 3                                                                                         |                               |
| TREC tested                                         | Day 15/16                                    | Day 12/13                                                                                                                              | Day 11                                                                                        |                               |
| TREC results available                              | Day 16                                       | Day 12                                                                                                                                 | Day 11                                                                                        |                               |
| Repeated TRECs/ $\mu$ l (age)                       | 0 (Day 19)                                   | 9.1 (Day 17)<br>7.6 (9 months)                                                                                                         | ND                                                                                            |                               |
| 1 <sup>st</sup> FACS (age):                         | FACS (Days 19 and 21):                       | FACS (Days 17 and 24):                                                                                                                 | 1 <sup>st</sup> FACS: (day 10)                                                                |                               |
| CD3 x10 <sup>6</sup> /L                             | 58-29                                        | 1591-1500                                                                                                                              | 198                                                                                           | 2300-7000 x10 <sup>6</sup> /L |
| CD4 x10 <sup>6</sup> /L                             | <5                                           | 1303-1215                                                                                                                              | 109                                                                                           | 1700-5300 x10 <sup>6</sup> /L |
| CD8 x10 <sup>6</sup> /L                             | 27-14                                        | 268-262                                                                                                                                | 46                                                                                            | 400-1700 x10 <sup>6</sup> /L  |
| CD19 x10 <sup>6</sup> /L                            | 510-611                                      | 16                                                                                                                                     | ND                                                                                            | 600-1900 x10 <sup>6</sup> /L  |
| NK x10 <sup>6</sup> /L                              | 169-41                                       | 903-489                                                                                                                                | ND                                                                                            | 200-1400 x10 <sup>6</sup> /L  |
| CD4+ naïve %                                        | 0%                                           | 77-69                                                                                                                                  | ND                                                                                            | 66-100%                       |
| RTE % of naïve CD4+                                 | 0%                                           | 56-50                                                                                                                                  | ND                                                                                            | 50-100%                       |
| Lymphocytes x10 <sup>9</sup> /L                     | 0.8-0.7 (Days 18-21)                         | 2.6-2.5-2.2 (Days 17-19-24)                                                                                                            | ND                                                                                            | 2.0-17 x10 <sup>9</sup> /L    |
| WBC x10 <sup>9</sup> /L                             | 5.9-4.8 (Days 18-21)                         | 6.4-5.9-4.3 (Days 17-19-24)                                                                                                            | 5.2                                                                                           | 5.0-21 x10 <sup>9</sup> /L    |
| Age at molecular diagnosis                          | Day 22                                       | Day 17                                                                                                                                 | After death                                                                                   |                               |
| Gene                                                | <i>IL2RG</i>                                 | <i>RAG2</i>                                                                                                                            | <i>RMRP</i>                                                                                   |                               |
| SNV/CNV                                             | c.[359dupA];[0] HEMI                         | c.[1367C>T];[1367C>T] HOM                                                                                                              | n.[71A>G];[71A>G] HOM                                                                         |                               |
| Predicted effect on protein                         | p.Glu121Glyfs*47                             | p.Ala456Val                                                                                                                            | NA                                                                                            |                               |
| Refseq                                              | NM_000206.2                                  | NM_000536.3                                                                                                                            | NR_003051.3                                                                                   |                               |
| Classification ACMG <sup>1</sup>                    | 5                                            | 3                                                                                                                                      | 5                                                                                             |                               |
| HGMD/ClinVar                                        | CI972629                                     | Not, but p.Ala456Thr reported in HGMD: CM0910583                                                                                       | CR011576/<br>RCV000015275.24,<br>SCV000035534                                                 |                               |
| gnomAD allele frequency                             | 0                                            | 0                                                                                                                                      | 0.001,<br>no homozygotes                                                                      |                               |
| Panel                                               | PIDv2                                        | PIDv2                                                                                                                                  | PIDv2                                                                                         |                               |
| Mean X reads                                        | 242                                          | 556                                                                                                                                    | 305                                                                                           |                               |
| >100X                                               | 85%                                          | 92%                                                                                                                                    | 85%                                                                                           |                               |
| >20X                                                | 95%                                          | 96%                                                                                                                                    | 95%                                                                                           |                               |
| Other gene tests                                    | Sanger validation                            | Sanger validation                                                                                                                      | Sanger validation                                                                             |                               |
| Disease development, Treatment and outcome          | Successful HSCT 3 months of age              | Successful HSCT 14 months old. Atopic eczema, no skin GVHD. Hemolytic anemia at 21 months, resolved with Rituximab /steroid treatment. | Deceased 1 month old due to severe intestinal abnormality with complete Hirschsprungs disease |                               |
| Donor type<br>Preconditioning:<br>GVHD prophylaxis: | 9/10 MUD,<br>Treo, Flu, ATG<br>ATG, CyA, MMF | 10/10 MUD,<br>Treo, Flu, ATG<br>ATG, CyA, MMF                                                                                          |                                                                                               |                               |
| CMV on initial card                                 | Negative                                     | Negative                                                                                                                               | NA                                                                                            |                               |
| Breastfeeding stopped                               | Day 17                                       | Day 16                                                                                                                                 | NA                                                                                            |                               |
| CMV serology mom                                    | Negative, day 25                             | IgG positive, IgM negative, day 20                                                                                                     | NA                                                                                            |                               |
| CMV infected                                        | NO                                           | NO                                                                                                                                     | NA                                                                                            |                               |

| Latest FACS (time)q             | FACS (1y post-transplant): | FACS (1y post-transplant): | NA      |                               |
|---------------------------------|----------------------------|----------------------------|---------|-------------------------------|
| CD3 x10 <sup>6</sup> /L         | 4597                       | 3020                       | NA      | 1400-8000 x10 <sup>6</sup> /L |
| CD4 x10 <sup>6</sup> /L         | 3228                       | 1409                       | NA      | 900-5500 x10 <sup>6</sup> /L  |
| CD8 x10 <sup>6</sup> /L         | 1196                       | 1414                       | NA      | 400-2300 x10 <sup>6</sup> /L  |
| CD19 x10 <sup>6</sup> /L        | 1424                       | 805                        | NA      | 600-2700 x 10 <sup>6</sup> /L |
| NK x10 <sup>6</sup> /L          | 216                        | 469                        | NA      | 100-1400 x 10 <sup>6</sup> /L |
| Naïve CD4+%                     | 85.2                       | ND                         | NA      |                               |
| RTE %                           | 91.1                       | ND                         | NA      |                               |
| Lymphocytes x10 <sup>9</sup> /L | 5.6 - 6.1                  | 2.0                        | NA      | 2.0-11 x 10 <sup>9</sup> /L   |
| WBC x10 <sup>9</sup> /L         | 8.6                        | 5.7                        | NA      | 6.0-17 x 10 <sup>9</sup> /L   |
| IgG g/L                         | 9.9                        | 6.7                        | NA      | 5.0-11 g/L                    |
| IgA g/L                         | < 0.10                     | 1.6                        | NA      | 0.1-1.0 g/L                   |
| IgM g/L                         | 1.9                        | 0.48                       | NA      | 0.3-1.6 g/L                   |
| Parental ethnicity              | Norwegian                  | Estonia                    | Somalia |                               |

#### Abbreviations:

ACMG, American College of Medical Genetics and Genomics' Guidelines for variant interpretation and classification; ATG, Antithymocyte globulin; BW, Birth weight; CNV, Copy number variation; CyA, Cyclosporin A (Sandimmun); DBS, Dried blood spot; FACS, fluorescence-activated cell sorting /lymphocyte flow cytometry; Flu, Fludarabine; g, gram; GA, Gestational age; gnomAD, The Genome Aggregation Database; GVHD, Graft-versus-host disease; HGMD, The Human Gene Mutation Database; HGNC, The HUGO Gene Nomenclature Committee; HSCT, Hematopoietic Stem Cell Transplantation; MMF, Mycophenolate Mofetil (CellCept®); MUD, Matched unrelated donor; NA, Not applicable; NBS, Newborn screening; ND, Not done; PIDv2, Primary immunodeficiency research panel version 2; RefSeq, The National Center for Biotechnology Information Reference Database; RTE, Recent thymic emigrants (CD4+, CD45RA+, CD31+); SCID, Severe combined immunodeficiency; SNV, Single nucleotide variant; TREC, T-cell receptor excision circles; Treo, Treosulfan; y, year; w, week; WBC, white blood cells

#### Resources:

ClinVar, <https://www.ncbi.nlm.nih.gov/clinvar/>

Gene names according to HGNC, <https://www.genenames.org/>

Gene variant classification according to ACMG standards and guidelines, Genetics in Medicine, 2015<sup>1</sup>

gnomAD, <https://gnomad.broadinstitute.org>

#### Reference:

1. Richards, S., Aziz, N., Bale, S., Bick, D., Das, S., Gastier-Foster, J., Grody, W.W., Hegde, M., Lyon, E., Spector, E., et al. (2015). Standards and guidelines for the interpretation of sequence variants: a joint consensus recommendation of the American College of Medical Genetics and Genomics and the Association for Molecular Pathology. *Genet Med* 17, 405-424.
