# Supplementary material for: Second-Tier Next Generation Sequencing Integrated in Nationwide Newborn Screening Provides Rapid Molecular Diagnostics of Severe Combined Immunodeficiency
Source: PubMed Central journal article supplement (PMC7381310; doi:10.3389/fimmu.2020.01417), 2020-07-09
Supplement: Table_3.pdf [file Table_3.pdf]

**Supplemental Table S3 | Individuals with PIDs born outside pilot test region. TRECs and PIDv2 panel testing on the original DBS and on new samples.**

| Patient ID                       | PID_1                                                                                             | PID_2                                                                                       | PID_3                                                                            | PID_4                                      |                                  | PID_5                             |                                  | PID_6                                                                      |
|----------------------------------|---------------------------------------------------------------------------------------------------|---------------------------------------------------------------------------------------------|----------------------------------------------------------------------------------|--------------------------------------------|----------------------------------|-----------------------------------|----------------------------------|----------------------------------------------------------------------------|
| Year                             | 2016                                                                                              | 2016                                                                                        | 2017                                                                             | 2017                                       |                                  | 2017                              |                                  | 2017                                                                       |
| Symptoms at time of diagnosis    | SGA, microcephaly, transient lymphopenia, persistent neutropenia and low number of platelets      | SGA, microcephaly, failure to thrive, pigment patches skin                                  | Heart defect, choanal atresia, coloboma, infections                              | Heart defect, prematurity, Downs syndrome  |                                  | Heart defect, dysmorphic features |                                  | Infections, failure to thrive                                              |
| Gender                           | Female                                                                                            | Male                                                                                        | Male                                                                             | Male                                       |                                  | Male                              |                                  | Female                                                                     |
| GA w                             | 35                                                                                                | 36                                                                                          | 36                                                                               | 33                                         |                                  | 34                                |                                  | 40                                                                         |
| BW g                             | 1920                                                                                              | 1534                                                                                        | 2445                                                                             | 1844                                       |                                  | 1570                              |                                  | 3430                                                                       |
| TRECs/ $\mu$ l at birth          | 4.69                                                                                              | 1.9                                                                                         | 0                                                                                | 9.7                                        |                                  | 15.7                              |                                  | 71.8                                                                       |
| Repeated TRECs/ul (age)          | 23.8 (3 months)<br>0 (12 months)                                                                  | 0 (4 months)                                                                                | 0 (1.5 months)                                                                   | 0 (2 months)<br>17-32 (2.5 months)         |                                  | ND                                |                                  | 12.2 (6.8 months)                                                          |
| 1 <sup>st</sup> FACS (age):      | 2.5 months                                                                                        | 3 months                                                                                    | 1.5 months                                                                       | 2 months                                   | 2.5 months                       | Day 1                             | 3 months                         | 6.8 months                                                                 |
| CD3 $\times 10^6/L$              | 918 (2300-6500)                                                                                   | 98 (2300-6500) $\times 10^6/L$                                                              | 617 (2300-7000) $\times 10^6/L$                                                  | 212 (2300-6500) $\times 10^6/L$            | 1249 (2300-6500) $\times 10^6/L$ | 1146 (600-5000) $\times 10^6/L$   | 3922 (2300-6500) $\times 10^6/L$ | 1319 (2400-6900) $\times 10^6/L$                                           |
| CD4 $\times 10^6/L$              | 190 (1500-5000) $\times 10^6/L$                                                                   | 90 (1500-5000) $\times 10^6/L$                                                              | 552 (1700-5300) $\times 10^6/L$                                                  | 149 (1500-5000) $\times 10^6/L$            | 890 (1500-5000) $\times 10^6/L$  | 673 (400-3500) $\times 10^6/L$    | 2199 (1500-5000) $\times 10^6/L$ | 918 (1400-5100) $\times 10^6/L$                                            |
| CD8 $\times 10^6/L$              | 443 (500-1600) $\times 10^6/L$                                                                    | 9 (500-1600) $\times 10^6/L$                                                                | 73 (400-1700) $\times 10^6/L$                                                    | 60 (500-1600) $\times 10^6/L$              | 356 (500-1600) $\times 10^6/L$   | 465 (200-1900) $\times 10^6/L$    | 1597 (500-1600) $\times 10^6/L$  | 383 (600-2200) $\times 10^6/L$                                             |
| CD19 $\times 10^6/L$             | 3506 (600-3000) $\times 10^6/L$                                                                   | 72 (600-3000) $\times 10^6/L$                                                               | 4067 (600-1900) $\times 10^6/L$                                                  | 256 (600-3000) $\times 10^6/L$             | 308 (600-3000) $\times 10^6/L$   | 269 (100-1900) $\times 10^6/L$    | 3367 (600-3000) $\times 10^6/L$  | 9 (700-2500) $\times 10^6/L$                                               |
| NK $\times 10^6/L$               | 477 (100-1300) $\times 10^6/L$                                                                    | 7 (100-1300) $\times 10^6/L$                                                                | 4551 (200-1400) $\times 10^6/L$                                                  | 64 (100-1300) $\times 10^6/L$              | 117 (100-1300) $\times 10^6/L$   | 236 (100-1900) $\times 10^6/L$    | 1928 (100-1300) $\times 10^6/L$  | 40 (100-1000) $\times 10^6/L$                                              |
| Lymphocytes $\times 10^9/L$      | 7.2 (2-17) $\times 10^9/L$                                                                        | 0.3 (2-17) $\times 10^9/L$                                                                  | NA (2-17) $\times 10^9/L$                                                        | 0.6 (2-17) $\times 10^9/L$                 | NA (2-17) $\times 10^9/L$        | 1.6 (2-15) $\times 10^9/L$        | 6.1 (2-17) $\times 10^9/L$       | 1 (3.5-13.5) $\times 10^9/L$                                               |
| Neutrophils $\times 10^9/L$      | 0.4 (1-9) $\times 10^9/L$                                                                         | 1.0 (1-9) $\times 10^9/L$                                                                   | 6.3 (1-9) $\times 10^9/L$                                                        | 8.5 (1-9) $\times 10^9/L$                  | 1.4 (1-9) $\times 10^9/L$        | 4.0 (3-25) $\times 10^9/L$        | 3.6 (1-9) $\times 10^9/L$        | 3.1 (1-8.5) $\times 10^9/L$                                                |
| WBC $\times 10^9/L$              | 8.4 (5-19) $\times 10^9/L$                                                                        | 2.1 (5-19) $\times 10^9/L$                                                                  | 11.6 (5-19) $\times 10^9/L$                                                      | 10.8 (5-19) $\times 10^9/L$                | 4.3 (5-19) $\times 10^9/L$       | 6.1 (9-30) $\times 10^9/L$        | 10.9 (5-19) $\times 10^9/L$      | 4.4 (6-17) $\times 10^9/L$                                                 |
| IgG g/L                          | 10.6 (3-7) g/L                                                                                    | 2.4 (3-7) g/L                                                                               | 4.3 (3-7) g/L                                                                    | 2.4 (3-7) g/L                              | NA                               | NA                                | 3.3 (3-7) g/L                    | < 1.0 (3-7) g/L                                                            |
| IgA g/L                          | < 0.1 (0-0.3) g/L                                                                                 | < 0.2 (0-0.3) g/L                                                                           | 0.11 (0-0.3) g/L                                                                 | 0.4 (0-0.3) g/L                            | NA                               | NA                                | 0.12 (0-0.3) g/L                 | < 0.1 (0-0.3) g/L                                                          |
| IgM g/L                          | 0.22 (0.1-0.8) g/L                                                                                | 0.5 (0.1-0.8) g/L                                                                           | 0.44 (0.1-0.8) g/L                                                               | 0.2 (0.1-0.8) g/L                          | NA                               | NA                                | 0.77 (0.1-0.8) g/L               | 1.1 (0.1-0.8) g/L                                                          |
| Gene                             | unknown                                                                                           | unknown                                                                                     | <i>CHD7</i>                                                                      | Trisomy 21                                 |                                  | <i>TBX1</i>                       |                                  | <i>IKZF1</i>                                                               |
| SNV/CNV                          | NA                                                                                                | NA                                                                                          | c.[5833C>T];[=]                                                                  | 47,XY,+21                                  |                                  | 22q11.21 del                      |                                  | c.[476A<G];[=]                                                             |
| protein                          | NA                                                                                                | NA                                                                                          | p.Arg1945*                                                                       | NA                                         |                                  | NA                                |                                  | p.Asn159Ser                                                                |
| Refseq                           | NA                                                                                                | NA                                                                                          | NM_017780.3                                                                      | NA                                         |                                  | NA                                |                                  | NM_006060.4                                                                |
| Classification ACMG <sup>1</sup> | NA                                                                                                | NA                                                                                          | 5                                                                                | NA                                         |                                  | NA                                |                                  | 4                                                                          |
| HGMD/ClinVar                     | NA                                                                                                | NA                                                                                          | RCV-000258138.1<br>CM060228                                                      | NA                                         |                                  | NA                                |                                  | CM173423 <sup>2</sup>                                                      |
| gnomAD allele frequency          | NA                                                                                                | NA                                                                                          | 0 in gnomAD                                                                      | NA                                         |                                  | NA                                |                                  | 0 in gnomAD, but one heterozygote individual reported among 60 000 in ExAC |
| Gene panel                       | PIDv2 and IEM                                                                                     | PIDv2 and Hematology                                                                        | NBSv1                                                                            | NBSv1                                      |                                  | NBSv1                             |                                  | PIDv2                                                                      |
| Other gene tests                 | mtDNA deletion test normal. WES trio and WGS trio, No pathogenic variants detected                | Fanconi anemia on Mitomycin C test. WES trio and WGS trio, No pathogenic variants detected  | Sanger validation                                                                | Trisomy test                               |                                  | MLPA                              |                                  | Sanger validation                                                          |
| Disease development              | Short stature, Microcephaly and DD/ID. Developed diabetes mellitus, but Pearson syndrome excluded | DD/ID, Microcephaly OFC 44.3cm at 2y3m = 3 cm below 2.5p Short stature 86 cm at 2.5y, at 3p | Short stature, Microcephaly, Seizures, Tracheostomia, needs respiratory support. | Heart surgery of ASD, VSD, PDA at 2 months |                                  |                                   |                                  | <i>P.jirovecii</i>                                                         |

|                       |                                                                                                                                                               |                                                                                                            |                                                                                                                                           |                                                                                |                          |                                                        |
|-----------------------|---------------------------------------------------------------------------------------------------------------------------------------------------------------|------------------------------------------------------------------------------------------------------------|-------------------------------------------------------------------------------------------------------------------------------------------|--------------------------------------------------------------------------------|--------------------------|--------------------------------------------------------|
| Treatment and outcome | Treated with immunomodulatory agents, steroids, tacrolimus. Deceased at 1.5 years of age after <i>P. jirovecii</i> infection followed by respiratory failure. | Successful HSCT 6,5 months old 10/10 MUD Preconditioning regimen: RIC Fanconi anemia protocol Flu, CP, ATG | At 2 years of age: prophylactic antibiotics, antifungal, antiviral and Sc immunoglobulins. Thymus transplantation were considered earlier | Lymphopenia $1.9 \times 10^9/L$ at 1 years of age, but no recurrent infections | Prophylactic antibiotics | Successful HSCT <sup>3</sup> 9 months of age 11/12 MUD |
| Parental ethnicity    | Norwegian                                                                                                                                                     | Norwegian                                                                                                  | Arab                                                                                                                                      | Norwegian                                                                      | Pakistan                 | Norwegian                                              |

Abnormal laboratory results are marked in bold in the table above.

Abbreviations:

aCGH, array comparative genomic hybridization chromosomal/chromosomal microarray; ACMG, American College of Medical Genetics and Genomics' Guidelines for variant interpretation and classification; ATG, Antithymocyte globulin; BW, Birth weight; CNV, Copy number variation; CP, Cyclophosphamide; DD/ID, Developmental delay/Intellectual disability; FACS, fluorescence-activated cell sorting /lymphocyte flow cytometry; Flu, Fludarabine; g, gram; GA, Gestational age; gnomAD, The Genome Aggregation Database; Hematology, Ion Ampliseq™ Hematology research panel; HGMD, The Human Gene Mutation Database; HGNC, The HUGO Gene Nomenclature Committee; HSCT, Hematopoietic Stem Cell Transplantation; IEM, Ion Ampliseq™ Inborn Errors of Metabolism research panel; MLPA, multiplex ligation-dependent probe amplification; MUD, Matched unrelated donor; NA, Not applicable; NBS, Newborn screening; NBSv1, Newborn screening customized 160-gene panel version 1; ND, Not done; OFC, occipital frontal circumference; PIDv2, Primary immunodeficiency research panel version 2; PID, Primary immunodeficiency; Refseq, The National Center for Biotechnology Information Reference Database; RIC, Reduced intensity conditioning; SCID, Severe combined immunodeficiency; Sc, Subcutaneous; SGA, Small for gestational age; SNV, Single nucleotide variant; TREC, T-cell receptor excision circles; Trio-test; testing the child and both parents in comparison; WES, whole exome sequencing; WGS, whole genome sequencing; y, year; w, week; WBC, white blood cells

Resources:

ClinVar, <https://www.ncbi.nlm.nih.gov/clinvar/>

Gene names according to HGNC, <https://www.genenames.org/>

Gene variant classification according to ACMG standards and guidelines, Genetics in Medicine, 2015

gnomAD, <https://gnomad.broadinstitute.org>

References:

- Richards, S., Aziz, N., Bale, S., Bick, D., Das, S., Gastier-Foster, J., Grody, W.W., Hegde, M., Lyon, E., Spector, E., et al. (2015). Standards and guidelines for the interpretation of sequence variants: a joint consensus recommendation of the American College of Medical Genetics and Genomics and the Association for Molecular Pathology. *Genet Med* 17, 405-424.
- Yoshida, N., Sakaguchi, H., Muramatsu, H., Okuno, Y., Song, C., Dovat, S., Shimada, A., Ozeki, M., Ohnishi, H., Teramoto, T., et al. (2017). Germline IKAROS mutation associated with primary immunodeficiency that progressed to T-cell acute lymphoblastic leukemia. *Leukemia* 31, 1221-1223.
- Kellner, E.S., Krupski, C., Kuehn, H.S., Rosenzweig, S.D., Yoshida, N., Kojima, S., Boutboul, D., Latour, S., Barlogis, V., Galambrun, C., et al. (2019). Allogeneic hematopoietic stem cell transplant outcomes for patients with dominant negative IKZF1/IKAROS mutations. *J Allergy Clin Immunol* 144, 339-342.
