# Supplementary material for: Second-Tier Next Generation Sequencing Integrated in Nationwide Newborn Screening Provides Rapid Molecular Diagnostics of Severe Combined Immunodeficiency
Source: PubMed Central journal article supplement (PMC7381310; doi:10.3389/fimmu.2020.01417), 2020-07-09
Supplement: Table_4.pdf [file Table_4.pdf]

**Supplemental Table S4 | Retrospective study: TRECs and NGS on DNA from the original NBS DBS in individuals with known SCID or PIDs.**

|                              | INDIVIDUALS WITH KNOWN SCID or severe T-cell deficiency |                                |                                 |                                                            |                                                                |                                     |                               |              |              | OTHER KNOWN PIDs                              |                                                                             |
|------------------------------|---------------------------------------------------------|--------------------------------|---------------------------------|------------------------------------------------------------|----------------------------------------------------------------|-------------------------------------|-------------------------------|--------------|--------------|-----------------------------------------------|-----------------------------------------------------------------------------|
| Patient ID                   | KID_1                                                   | KID_2                          | KID_3                           | KID_4                                                      | KID_5                                                          | KID_6                               | KID_7                         | KID_8        | KID_9        | KID_10                                        | KID_11                                                                      |
| Year                         | 2012                                                    | 2010                           | 2010                            | 2015                                                       | 2012                                                           | 2014                                | 2015                          | 2006         | 2009         | 2009                                          | 2012                                                                        |
| Gender                       | Male                                                    | Female                         | Female                          | Female                                                     | Female                                                         | Male                                | Male                          | Female       | Male         | Male                                          | Female                                                                      |
| GA                           | 37                                                      | 34                             | 38,5                            | 42                                                         | 40                                                             | 42                                  | 39                            | 38           | 39           | 40                                            | 38                                                                          |
| BW                           | 2954                                                    | 1999                           | 2618                            | 3360                                                       | 4135                                                           | 4420                                | 2484                          | NA           | 3445         | 3775                                          | 2950                                                                        |
| TRECs/ $\mu$ l Initial NBS   | 0                                                       | 0                              | 0                               | 0                                                          | 11                                                             | 0                                   | 0                             | 0            | 0            | 25.5                                          | 60                                                                          |
| Gene                         | <i>IL2RG</i>                                            | <i>LIG4</i>                    | <i>IL7R</i>                     | <i>ADA</i>                                                 | <i>PGM3</i>                                                    | <i>JAK3</i>                         | <i>TBX1</i>                   | <i>TBX1</i>  | <i>TBX1</i>  | <i>IKZF1</i>                                  | <i>RECQL4</i>                                                               |
| SNV/CNV                      | c.[924+5G>A];[0]                                        | c.[1341G>T];[482delC]          | c.[707-2A>G];[707-2A>G]         | c.[7C>T];[7C>T]                                            | c.[737A>G];[737A>G]                                            | c.1837C>T; c.1695C>A                | 22q11.21 del                  | 22q11.21 del | 22q11.21 del | c.1618388_589+2308del (16.8 kb del exons 4-5) | c.[2269]C>T; ND                                                             |
| Zygoty                       | HEMI                                                    | COMP HET                       | HOM                             | HOM                                                        | HOM                                                            | COMP HET                            | HET                           | HET          | HET          | HET                                           | COMP HET                                                                    |
| Effect on protein            | Splice defect                                           | p.Trp447Cys; p.Ala161Valfs*6   | Splice defect                   | p.Gln3*                                                    | p.Ala246Gly                                                    | p.Arg613*; p.Cys565*                | loss                          | loss         | loss         | Inframe deletion                              | p.Gln757*                                                                   |
| Refseq                       | NM_000206.2                                             | NM_002312.3                    | NM_002185.3                     | NM_000022.2                                                | NM_015599.2                                                    | NM_000215.3                         | NM_080647.1                   | NM_080647.1  | NM_080647.1  | NM_006060.5                                   | NM_004260.3                                                                 |
| ACMG <sup>1</sup>            |                                                         | 4;4                            |                                 | 5                                                          | 5                                                              | 5;5                                 |                               |              |              |                                               | 5                                                                           |
| HGMD/ClinVar                 |                                                         | CM157470; CD171521             |                                 | CM950010, RCV000433743.1                                   |                                                                | CM1516563; CM950705, RCV000009957.4 |                               |              |              |                                               | RCV000006435.4 <sup>2</sup> Immunodeficiency and <i>RECQL4</i> <sup>3</sup> |
| gnomAD                       |                                                         | 0.00001219; 0                  |                                 | 0 in gnomAD but known to be recurrent in Somali population |                                                                | 0.00001219; 0                       |                               |              |              |                                               | 0.0001193                                                                   |
| Panel                        | PIDv1                                                   | PIDv1                          | PIDv1                           | PIDv2                                                      | PIDv1                                                          | PIDv1                               | PIDv2                         | PIDv2        | PIDv2        | PIDv2                                         | PIDv1                                                                       |
| Mean X reads                 | 313                                                     | 235                            | 310                             | 304                                                        | 358                                                            | 377                                 | 120                           | 292          | 182          |                                               | 245                                                                         |
| >100X                        | 84%                                                     | 75%                            | 82%                             | 87%                                                        | 84%                                                            | 91%                                 | 51%                           | 75%          | 66%          |                                               | 84%                                                                         |
| >20X                         | 96%                                                     | 95%                            | 96%                             | 97%                                                        | 97%                                                            | 98%                                 | 93%                           | 95%          | 94%          |                                               | 97%                                                                         |
| Patient IDs in other reports | 116.1 in JACI 2017 <sup>4</sup>                         | 38.1 in JACI 2017 <sup>4</sup> | 114.1 in JACI 2017 <sup>4</sup> |                                                            | 110.1 in JACI 2017 <sup>4</sup> , P1 in AJHG 2014 <sup>5</sup> | 117.1 in JACI 2017 <sup>4</sup>     | Deceased, Thymus transplanted | Deceased     | Deceased     | E2 in NEJM 2016 <sup>6</sup>                  | 127.1 in JACI 2017 <sup>4</sup>                                             |

#### Abbreviations:

ACMG, American College of Medical Genetics and Genomics' Guidelines for variant interpretation and classification; BW, Birth weight; CNV, Copy number variation; COMP HET, Compound heterozygote; g, gram; GA, Gestational age; gnomAD, The Genome Aggregation Database; HGMD, The Human Gene Mutation Database; HGNC, The HUGO Gene Nomenclature Committee; HOM, Homozygote; ND, Not detected; PIDs, Primary immunodeficiencies; PIDv2, Primary immunodeficiency research panel version 2; RefSeq, The National Center for Biotechnology Information Reference Database; SCID, Severe combined immunodeficiency; SNV, Single nucleotide variant; TREC, T-cell receptor excision circles; w, weeks

#### Resources:

ClinVar, <https://www.ncbi.nlm.nih.gov/clinvar/>

Gene names according to HGNC, <https://www.genenames.org/>

Gene variant evaluation according to ACMG standards and guidelines, Genetics in Medicine, 2015<sup>1</sup>

gnomAD, <https://gnomad.broadinstitute.org>

#### References:

1. Richards, S., Aziz, N., Bale, S., Bick, D., Das, S., Gastier-Foster, J., Grody, W.W., Hegde, M., Lyon, E., Spector, E., et al. (2015). Standards and guidelines for the interpretation of sequence variants: a joint consensus recommendation of the American College of Medical Genetics and Genomics and the Association for Molecular Pathology. *Genet Med* 17, 405-424.
2. Siitonen, H.A., Sotkasiira, J., Biervliet, M., Benmansour, A., Capri, Y., Cormier-Daire, V., Crandall, B., Hannula-Jouppi, K., Hennekam, R., Herzog, D., et al. (2009). The mutation spectrum in RECQL4 diseases. *Eur J Hum Genet* 17, 151-158.
3. Broom, M.A., Wang, L.L., Otta, S.K., Knutsen, A.P., Siegfried, E., Batanian, J.R., Kelly, M.E., and Shah, M. (2006). Successful umbilical cord blood stem cell transplantation in a patient with Rothmund-Thomson syndrome and combined immunodeficiency. *Clin Genet* 69, 337-343.
4. Stray-Pedersen, A., Sorte, H.S., Samarakoon, P., Gambin, T., Chinn, I.K., Coban Akdemir, Z.H., Erichsen, H.C., Forbes, L.R., Gu, S., Yuan, B., et al. (2017). Primary immunodeficiency diseases: Genomic approaches delineate heterogeneous Mendelian disorders. *J Allergy Clin Immunol* 139, 232-245.
5. Stray-Pedersen, A., Backe, P.H., Sorte, H.S., Morkrid, L., Chokshi, N.Y., Erichsen, H.C., Gambin, T., Elgstoen, K.B., Bjoras, M., Wlodarski, M.W., et al. (2014). PGM3 mutations cause a congenital disorder of glycosylation with severe immunodeficiency and skeletal dysplasia. *Am J Hum Genet* 95, 96-107.
6. Kuehn, H.S., Boisson, B., Cunningham-Rundles, C., Reichenbach, J., Stray-Pedersen, A., Gelfand, E.W., Maffucci, P., Pierce, K.R., Abbott, J.K., Voelkerding, K.V., et al. (2016). Loss of B Cells in Patients with Heterozygous Mutations in IKAROS. *N Engl J Med* 374, 1032-1043.
