# Supplementary material for: Second-Tier Next Generation Sequencing Integrated in Nationwide Newborn Screening Provides Rapid Molecular Diagnostics of Severe Combined Immunodeficiency
Source: PubMed Central journal article supplement (PMC7381310; doi:10.3389/fimmu.2020.01417), 2020-07-09
Supplement: Table_6.pdf [file Table_6.pdf]

**Supplemental Table S6** | The individuals with the lowest TREC values in the national newborn screening program 2018 - 2019.

| TRECs/ $\mu$ l |                |        |      | GA | BW   | NICU | TPN     | Hospital | gene panel    | Known condition at birth                                                                       | Findings and history                                                                                         | Reported and/or redraw requested | YEAR | Redraw TRECs/ $\mu$ l |
|----------------|----------------|--------|------|----|------|------|---------|----------|---------------|------------------------------------------------------------------------------------------------|--------------------------------------------------------------------------------------------------------------|----------------------------------|------|-----------------------|
| Initial        | New extraction | Re-run | Mean |    |      |      |         |          |               |                                                                                                |                                                                                                              |                                  |      |                       |
| 0              | 0              | 0      | 0    | 41 | 3540 | NO   | NO      | Other    | NBSv2         | Healthy                                                                                        | <i>IL2RG</i> -SCID                                                                                           | Reported                         | 2019 | 0                     |
| 0              | 0              | 0      | 0    | 36 | 3618 | NO   | NO      | Other    | NBSv2         | Healthy                                                                                        | Artemis-SCID                                                                                                 | Reported                         | 2018 | 0                     |
| 0              | 0              | 3.4    | 1.1  | 40 | 2855 | YES  | NO      | OUS      | NBSv2 + PIDv2 | Microcephaly, kidney anomaly                                                                   | Nijmegen breakage syndrome-CID                                                                               | Reported                         | 2019 | 11                    |
| 0              | 5.3            | 0      | 1.8  | 39 | 2515 | NO   | NO      | Other    | NBSv2 + PIDv2 | Healthy                                                                                        | <i>JAK3</i> -SCID                                                                                            | Reported                         | 2018 | 0                     |
| 2.8            | 2.7            | 0.9    | 2.1  | 28 | 1330 | YES  | NO      | OUS      | NBSv2         | Trisomy 21, hydrops fetalis, congenital heart disease, arthrogyrposis                          | No other pathogenic variants on NBS panel                                                                    | Contacted NICU-pediatrician      | 2019 | NA                    |
| 12.1           | 4.2            | 0      | 5.4  | 26 | 300  | YES  | TPN     | Other    | NBSv2         | Extreme prematurity GA 26 <500g, Deceased 3 weeks old                                          | No pathogenic variants detected                                                                              | Redraw requested, not received   | 2018 | NA                    |
| 0              | 0              | 18     | 6.0  | 33 | 2220 | YES  | NO      | Other    | NBSv2         | Deceased 4 days old, Congenital heart disease                                                  | No pathogenic variants detected                                                                              | Not reported                     | 2018 | NA                    |
| 10             | 2.8            | 5.9    | 6.2  | 34 | 2900 | YES  | TPN +BT | OUS      | -             | Neonatal reduced health condition Intrathoracal teratoma                                       | No pathogenic variants detected                                                                              | Redraw requested due to TPN      | 2019 | 48.0                  |
| 3.2            | 5.1            | 12.1   | 6.8  | 40 | 3975 | YES  | TPN     | OUS      | NBSv2         | Intestinal malformation                                                                        | No pathogenic variants detected                                                                              | Redraw requested due to TPN      | 2018 | 18.5                  |
| 16.5           | 2.8            | 8.2    | 9.2  | 33 | 3340 | YES  | NO      | OUS      | NBSv2         | Neonatal reduced health condition. Hydrops fetalis, generalized oedema. Deceased 3.5 weeks old | No pathogenic variants detected on NBS panel. Clinical WES: <i>PMM2</i> -CGD <sup>a)</sup>                   | Redraw requested                 | 2018 | 30.53                 |
| 22.7           | 2.2            | 7.2    | 10.7 | 32 | 1895 | YES  | TPN +BT | OUS      | NBSv2         | Neonatal reduced health condition, Subcapsular liver haematoma                                 | No pathogenic variants detected                                                                              | Not reported                     | 2019 | NA                    |
| 3.3            | 4.7            | 24.3   | 10.8 | 29 | 1860 | YES  | NO      |          | NBSv2         | Prematurity                                                                                    | No pathogenic variants detected                                                                              | Not reported                     | 2018 | NA                    |
| 8.3            | 15.3           | 10.3   | 11.3 | 41 | 4065 | NO   | NO      | Other    | NBSv2 + PIDv2 | Apparently healthy, and born at term with normal BW                                            | No pathogenic variants detected, low TRECs on redraws, and few T cells on FACS, thymus aplasia on ultrasound | Redraw requested                 | 2019 | 6.6-17.5              |
| 16.9           | 12.2           | 5      | 11.4 | 30 | 1970 | YES  | TPN     | OUS      | NBSv2         | Delivery induced due to tachyarrhythmia AVRT and fetal hydrops, and ascites.                   | No pathogenic variants detected                                                                              | Not reported                     | 2018 | NA                    |
| 5.2            | 5.1            | 23.8   | 11.4 | 37 | 3000 | YES  | TPN +BT | OUS      | NBSv2         | Neonatal reduced health condition                                                              | No pathogenic variants detected                                                                              | Redraw requested due to TPN      | 2018 | 18.8                  |
| 0              | 25.9           | 8.3    | 11.4 | 38 | 3050 | YES  | NO      | OUS      | NBSv2         | Twin                                                                                           | No pathogenic variants detected, and TRECs normalized                                                        | Redraw requested                 | 2018 | 379.4                 |
| 2.4            | 21.8           | 10     | 11.4 | 38 | 2870 | YES  | NO      | Other    | NBSv2         | Necrotizing enterocolitis                                                                      | No pathogenic variants detected                                                                              | Not reported                     | 2019 | NA                    |
| 12.5           | 4.3            | 17.9   | 11.6 | 39 | 4145 | YES  | NO      | Other    | NBSv2         | Trisomy 21, congenital heart disease and intestinal malformation                               | No other pathogenic variants on NBS panel                                                                    | Not reported                     | 2019 | NA                    |
| 14.6           | 7.3            | 18.1   | 13.3 | 41 | 3360 | NO   | NO      | Other    | NBSv2 + PIDv2 | Healthy                                                                                        | No pathogenic variants detected. TRECs Normalized, FACS normalized                                           | Redraw requested                 | 2018 | 159.8-281.6           |
| 8.2            | 15.2           | 18.4   | 13.9 | 31 | 1724 | YES  | TPN     | OUS      | NBSv2         | Bilateral hydronephrosis and kidney anomaly                                                    | No pathogenic variants detected, and TRECs normalized                                                        | Redraw requested due to TPN      | 2019 | 591.3                 |
| 20.2           | 5.8            | 25     | 17   | 41 | 3860 | NO   | NO      | OUS      | NBSv2         | Born at term with normal BW                                                                    | No pathogenic variants detected, and TRECs normalized                                                        | Redraw requested                 | 2018 | 99.5                  |
| 20.2           | 15             | 16.6   | 17.3 | 35 | 2185 | NA   | NO      | Other    | NBSv2         | NOT KNOWN                                                                                      | No pathogenic variants detected                                                                              | Not reported                     | 2018 | NA                    |
| 8.09           | 31             | 15.8   | 18.3 | 37 | 2927 | YES  | NO      | OUS      | NBSv2         | Congenital heart disease                                                                       | No pathogenic variants detected on NBS panel                                                                 | Not reported                     | 2019 | NA                    |
| 20.8           | 28.6           | 6.7    | 18.7 | 41 | 3975 | NO   | NO      | OUS      | NBSv2         | Hypospadias and tongue-tie                                                                     | No pathogenic variants detected                                                                              | Not reported                     | 2019 | NA                    |

|       |       |      |      |    |      |     |     |       |               |                                                    |                                                                                                                             |                             |      |       |
|-------|-------|------|------|----|------|-----|-----|-------|---------------|----------------------------------------------------|-----------------------------------------------------------------------------------------------------------------------------|-----------------------------|------|-------|
| 6.5   | 20.7  | 30.5 | 19.2 | 41 | 3366 | YES | TPN | OUS   | NBSv2         | Congenital heart defect and microcephaly           | No pathogenic variants detected on NBS panel, and aCGH 180K og MLPA DiGeorge neg.                                           | Not reported                | 2019 | NA    |
| 22.5  | 14.5  | 13.8 | 16.9 | 33 | 2190 | YES | TPN | OUS   | NBSv2         | Prematurity GA 33, hydrothorax and arrhythmia      | No pathogenic variants detected on NBS panel                                                                                | Redraw requested due to TPN | 2019 | 80.7  |
| 13    | 16.8  | 21.1 | 17   | 26 | 600  | YES | TPN | Other | NBSv2         | Extreme prematurity GA 26, <1000g                  | No pathogenic variants detected                                                                                             | Not reported                | 2018 | NA    |
| 24.5  | 16.7  | 10.7 | 17.3 | 33 | 2200 | YES | NO  | OUS   | NBSv2         | Intestinal malformation                            | No pathogenic variants detected on NBS panel                                                                                | Not reported                | 2019 | NA    |
| 25.7  | 22    | 13.2 | 20.3 | 39 | 4205 | NA  | NO  | Other | NBSv2         | Born at term with normal BW                        | No pathogenic variants detected                                                                                             | Not reported                | 2019 | NA    |
| 24.2  | 5     | 32.9 | 20.7 | 39 | 3075 | YES | TPN | Other | NBSv2         | Neonatal reduced health condition                  | No pathogenic variants detected                                                                                             | Not reported                | 2018 | NA    |
| 21.6  | 17.8  | 24.1 | 21.2 | 40 | 3500 | NO  | NO  | OUS   | NBSv2         | Born at term with normal BW                        | No pathogenic variants detected                                                                                             | Not reported                | 2019 | NA    |
| 18.5  | 14.5  | 37.3 | 23.4 | 41 | 4590 | YES | NO  | Other | NBSv2         | Born at term with normal BW                        | No pathogenic variants detected                                                                                             | Redraw requested            | 2018 | 238.2 |
| 20    | 30.02 | 20.4 | 23.5 | 37 | 3120 | YES | NO  | Other | NBSv2 + PIDv2 | Generalized skin disease, Omenn syndrome suspected | NBS/PIDv2: homozygous VUS in <i>TTC7A</i> , but WES confirmed the diagnosis: <i>SPINK5</i> Netherton syndrome <sup>b)</sup> | Reported                    | 2018 | NA    |
| 17.72 | 12.55 | 41.9 | 24.1 | 40 | 3655 | NA  | NO  | Other | NBSv2         | Born at term with normal BW                        | No pathogenic variants detected                                                                                             | Not reported                | 2018 | NA    |
| 22.8  | 18    | 46.7 | 29.2 | 38 | 3080 | NO  | NO  | OUS   | NBSv2         | Born at term with normal BW                        | No pathogenic variants detected                                                                                             | Not reported                | 2019 | NA    |
| 19.5  | 0     | 24.5 | 14.7 | -  |      | NO  | NO  | Other | NBSv2 + PIDv2 | Adopted, 3 years old                               | No pathogenic variants detected                                                                                             | Not reported                | 2018 | NA    |

a) NM\_000303.2(PMM2):c.[357C>A];[620T>C], p.(Phe119Leu); p.(Phe207Ser)

b) NM\_006846.3 (SPINK5):c.[238dup];[238dup], p.(Ala80Glyfs\*19) and NM\_001288951.1(TTC7A):c.[887G>C];[887G>C],p.(Ser296Thr)

#### Abbreviations:

aCGH, array comparative genomic hybridization/chromosomal microarray; AVRT, Atrioventricular reciprocating tachycardia; BT, Blood transfusion – info marked on NBS card; BW, Birth weight; CID, Combined immunodeficiency; CGD, congenital disorder of glycosylation; g, gram; FACS, fluorescence-activated cell sorting /lymphocyte flow cytometry; g, gram; GA, Gestational age – info marked on NBS card; The Human Gene Mutation Database; HGNC, The HUGO Gene Nomenclature Committee; MLPA, Multiplex ligation-dependent probe amplification; NA, Not applicable/not known; NBS, Newborn screening; NBSv2, Newborn screening gene panel version 2; NICU, Neonatal intensive care unit; OUS, Oslo University Hospital; PIDv2, Primary immunodeficiency research panel version 2; SCID, Severe combined immunodeficiency; TPN, Total parenteral nutrition – info marked on NBS card; TREC, T-cell receptor excision circles; VUS, variant of uncertain significance; WES, whole exome sequencing

#### Resource:

Gene names according to HGNC, <https://www.genenames.org/>

Gene variant nomenclature according to the HGVS recommendations<sup>1</sup>, <http://www.HGVS.org/varnomen>

Gene variant classification according to ACMG standards and guidelines, Genetics in Medicine, 2015<sup>2</sup>

#### References:

1. den Dunnen, J.T., Dalgleish, R., Maglott, D.R., Hart, R.K., Greenblatt, M.S., McGowan-Jordan, J., Roux, A.F., Smith, T., Antonarakis, S.E., and Taschner, P.E. (2016). HGVS Recommendations for the Description of Sequence Variants: 2016 Update. Hum Mutat 37, 564-569.

2. Richards, S., Aziz, N., Bale, S., Bick, D., Das, S., Gastier-Foster, J., Grody, W.W., Hegde, M., Lyon, E., Spector, E., et al. (2015). Standards and guidelines for the interpretation of sequence variants: a joint consensus recommendation of the American College of Medical Genetics and Genomics and the Association for Molecular Pathology. Genet Med 17, 405-424.
