# Supplementary material for: Second-Tier Next Generation Sequencing Integrated in Nationwide Newborn Screening Provides Rapid Molecular Diagnostics of Severe Combined Immunodeficiency
Source: PubMed Central journal article supplement (PMC7381310; doi:10.3389/fimmu.2020.01417), 2020-07-09
Supplement: Table_7.pdf [file Table_7.pdf]

**Supplemental Table S7 | Newborn screening gene panels, versions 1-4.**

| GENE NAME<br>HGNC symbol | Disease group NBS              | Core US NBS | NBS disorder,<br>Norway 2019 | NBSv1 | NBSv2 | NBSv3 | NBSv4 |
|--------------------------|--------------------------------|-------------|------------------------------|-------|-------|-------|-------|
| <i>ABCD1</i>             | Core US NBS genes              | Core US NBS |                              |       | 2     | 3     | 4     |
| <i>ACAD8</i>             | IEM                            |             |                              |       | 2     | 3     | 4     |
| <i>ACADM</i>             | small panel IEM                | Core US NBS | MCAD                         | 1     | 2     | 3     | 4     |
| <i>ACADS</i>             | IEM                            |             |                              |       | 2     | 3     | 4     |
| <i>ACADSB</i>            | IEM                            |             |                              |       | 2     | 3     | 4     |
| <i>ACADVL</i>            | small panel IEM                | Core US NBS | VLCAD                        | 1     | 2     | 3     | 4     |
| <i>ACAT1</i>             | small panel IEM                | Core US NBS | BKT                          | 1     | 2     | 3     | 4     |
| <i>ADA</i>               | SCID and T cell defects        | Core US NBS | SCID and IEM                 | 1     | 2     | 3     | 4     |
| <i>ADK</i>               | IEM                            |             |                              |       | 2     | 3     | 4     |
| <i>AHCY</i>              | IEM                            |             |                              |       | 2     | 3     | 4     |
| <i>AK2</i>               | SCID and T cell defects        |             | SCID/CID                     | 1     | 2     | 3     | 4     |
| <i>ALDH7A1</i>           | IEM+                           |             |                              |       | 2     | 3     | 4     |
| <i>ALDOB</i>             | IEM+                           |             |                              |       |       | 3     | 4     |
| <i>ALPL</i>              | IEM+                           |             |                              |       | 2     | 3     | 4     |
| <i>ARG1</i>              | IEM Extended US NBS            |             |                              |       | 2     | 3     | 4     |
| <i>ARPC1B</i>            | SCID and T cell defects        |             | SCID/CID                     | 1     | 2     | 3     | 4     |
| <i>ARSA</i>              | Lysosomal                      | Core US NBS |                              |       | 2     | 3     | 4     |
| <i>ARSB</i>              | IEM+                           |             |                              |       |       |       | 4     |
| <i>ASL</i>               | Core US NBS genes              | Core US NBS |                              |       | 2     | 3     | 4     |
| <i>ASS1</i>              | Core US NBS genes              | Core US NBS |                              |       | 2     | 3     | 4     |
| <i>ATM</i>               | SCID and T cell defects        |             | SCID/CID                     | 1     | 2     | 3     | 4     |
| <i>ATP5D = ATP5F1D</i>   | IEM+                           |             |                              |       |       | 3     | 4     |
| <i>BCKDHA</i>            | small panel IEM                | Core US NBS | MSUD                         | 1     | 2     | 3     | 4     |
| <i>BCKDHB</i>            | small panel IEM                | Core US NBS | MSUD                         | 1     | 2     | 3     | 4     |
| <i>BCKDK</i>             | IEM+                           |             |                              |       | 2     | 3     | 4     |
| <i>BCL11B</i>            | SCID and T cell defects        |             | SCID/CID                     | 1     | 2     | 3     | 4     |
| <i>BLNK</i>              | Antibody deficiency, low KRECs |             |                              |       | 2     | 3     | 4     |
| <i>BTD</i>               | small panel IEM                | Core US NBS | BTD                          | 1     | 2     | 3     | 4     |
| <i>BTK</i>               | Antibody deficiency, low KRECs |             |                              |       | 2     | 3     | 4     |
| <i>CBS</i>               | small panel IEM                | Core US NBS | HCY                          | 1     | 2     | 3     | 4     |
| <i>CD247/CD3Z</i>        | CID/NBS+                       |             | SCID/CID                     |       | 2     | 3     | 4     |
| <i>CD3D</i>              | SCID and T cell defects        |             | SCID/CID                     | 1     | 2     | 3     | 4     |
| <i>CD3E</i>              | SCID and T cell defects        |             | SCID/CID                     | 1     | 2     | 3     | 4     |
| <i>CD3G</i>              | SCID and T cell defects        |             | SCID/CID                     | 1     | 2     | 3     | 4     |
| <i>CD40LG</i>            | Antibody deficiency, low KRECs |             |                              |       | 2     | 3     | 4     |
| <i>CD79A</i>             | Antibody deficiency, low KRECs |             |                              |       | 2     | 3     | 4     |
| <i>CD79B</i>             | Antibody deficiency, low KRECs |             |                              |       | 2     | 3     | 4     |
| <i>CD8A</i>              | SCID and T cell defects        |             | SCID/CID                     | 1     | 2     | 3     | 4     |
| <i>CDC42</i>             | CID/NBS+                       |             | SCID/CID                     |       |       | 3     | 4     |
| <i>CDCA7</i>             | Low T cells                    |             | SCID/CID                     |       |       |       | 4     |
| <i>CFTR</i>              | CF                             | Core US NBS | CF                           | 1     | 2     | 3     | 4     |
| <i>CHD7</i>              | SCID and T cell defects        |             | SCID/CID                     | 1     | 2     | 3     | 4     |
| <i>CORO1A</i>            | SCID and T cell defects        |             | SCID/CID                     | 1     | 2     | 3     | 4     |
| <i>CPS1</i>              | IEM+                           |             |                              |       | 2     | 3     | 4     |
| <i>CPT1A</i>             | small panel IEM                |             | CPT1                         | 1     | 2     | 3     | 4     |

|                       |                                                                 |             |                  |   |   |   |   |
|-----------------------|-----------------------------------------------------------------|-------------|------------------|---|---|---|---|
| <i>CPT2</i>           | small panel IEM                                                 |             | CPT2             | 1 | 2 | 3 | 4 |
| <i>CTNBL1</i>         | Antibody deficiency, low KRECs                                  |             |                  |   |   | 3 | 4 |
| <i>CYP11A1</i>        | small panel IEM                                                 |             |                  |   | 2 | 3 | 4 |
| <i>CYP17A1</i>        | small panel IEM                                                 |             | CAH              | 1 | 2 | 3 | 4 |
| <i>CYP21A2</i>        | CAH                                                             | Core US NBS | CAH              |   | 2 |   | 4 |
| <i>DBT</i>            | small panel IEM                                                 | Core US NBS | MSUD             | 1 | 2 | 3 | 4 |
| <i>DCLRE1C</i>        | SCID and T cell defects                                         |             | SCID/CID         | 1 | 2 | 3 | 4 |
| <i>DKC1</i>           | CID                                                             |             |                  |   | 2 | 3 | 4 |
| <i>DLD</i>            | small panel IEM                                                 | Core US NBS | MSUD             | 1 | 2 | 3 | 4 |
| <i>DMD</i>            | Other                                                           |             |                  |   | 2 | 3 | 4 |
| <i>DNAJC12</i>        | IEM+                                                            |             | PKU differential |   |   | 3 | 4 |
| <i>DNAJC21</i>        | SCID and T cell defects, pancytopenia                           |             | SCID/CID         |   |   |   | 4 |
| <i>DNMT3B</i>         | SCID and T cell defects                                         |             | SCID/CID         | 1 | 2 | 3 | 4 |
| <i>DOCK2</i>          | SCID and T cell defects                                         |             | SCID/CID         | 1 | 2 | 3 | 4 |
| <i>DOCK8</i>          | SCID and T cell defects                                         |             | SCID/CID         | 1 | 2 | 3 | 4 |
| <i>EFL1 (=EFTUD1)</i> | SCID and T cell defects                                         |             | SCID/CID         | 1 | 2 | 3 | 4 |
| <i>EPG5</i>           | Low T cells                                                     |             | SCID/CID         |   |   |   | 4 |
| <i>ERCC6L2</i>        | Low T cells                                                     |             | SCID/CID         |   |   |   | 4 |
| <i>ETFA</i>           | small panel IEM                                                 | Core US NBS | GA2              | 1 | 2 | 3 | 4 |
| <i>ETFB</i>           | small panel IEM                                                 | Core US NBS | GA2              | 1 | 2 | 3 | 4 |
| <i>ETFDH</i>          | small panel IEM                                                 | Core US NBS | GA2              | 1 | 2 | 3 | 4 |
| <i>EXTL3</i>          | SCID and T cell defects                                         |             | SCID/CID         | 1 | 2 | 3 | 4 |
| <i>FAH</i>            | small panel IEM                                                 | Core US NBS | TYR1             | 1 | 2 | 3 | 4 |
| <i>FOXE1 (TITF2)</i>  | Other, congenital hypothyreosis, Syndromal CH                   |             | CH               |   |   | 3 | 4 |
| <i>FOXN1</i>          | SCID and T cell defects                                         |             | SCID/CID         | 1 | 2 | 3 | 4 |
| <i>G6PD</i>           | Other anemia                                                    |             |                  |   |   | 3 | 4 |
| <i>GAA</i>            | Core US NBS genes                                               | Core US NBS |                  |   | 2 | 3 | 4 |
| <i>GALE</i>           | IEM Extended US NBS                                             |             |                  |   | 2 | 3 | 4 |
| <i>GALK1</i>          | IEM Extended US NBS                                             |             |                  |   | 2 | 3 | 4 |
| <i>GALNS</i>          | IEM+                                                            |             |                  |   |   |   | 4 |
| <i>GALT</i>           | Core US NBS genes                                               | Core US NBS |                  |   | 2 | 3 | 4 |
| <i>GAMT</i>           | IEM+                                                            |             |                  |   | 2 |   | 4 |
| <i>GATA2</i>          | CID                                                             |             |                  |   | 2 | 3 | 4 |
| <i>GATM</i>           | IEM+                                                            |             |                  |   | 2 | 3 | 4 |
| <i>GCDH</i>           | small panel IEM                                                 | Core US NBS | GA1              | 1 | 2 | 3 | 4 |
| <i>GCH1</i>           | DOPA-responsive dystonia, with or without hyperphenylalaninemia |             | PKU differential |   |   |   | 4 |
| <i>GINS1</i>          | Low T cells                                                     |             | SCID/CID         |   |   |   | 4 |
| <i>HADHA</i>          | small panel IEM                                                 |             | TFP/LCHAD        | 1 | 2 | 3 | 4 |
| <i>HADHB</i>          | small panel IEM                                                 | Core US NBS | TFP              | 1 | 2 | 3 | 4 |
| <i>HBB</i>            | Core US NBS genes                                               | Core US NBS |                  |   | 2 | 3 | 4 |
| <i>HLCS</i>           | small panel IEM                                                 |             | HCS              | 1 | 2 | 3 | 4 |
| <i>HMGCL</i>          | IEM+                                                            | Core US NBS | HMGCL            |   | 2 | 3 | 4 |
| <i>HMGCS2</i>         | IEM+                                                            |             |                  |   | 2 | 3 | 4 |
| <i>HPD</i>            | IEM Extended US NBS                                             |             |                  |   | 2 | 3 | 4 |
| <i>ICOSL</i>          | Low T cells                                                     |             | SCID/CID         |   |   |   | 4 |
| <i>IDS</i>            | IEM+                                                            |             |                  |   |   |   | 4 |
| <i>IDUA</i>           | IEM+                                                            | Core US NBS |                  |   | 2 |   | 4 |
| <i>IGHM</i>           | Antibody deficiency, low KRECs                                  |             |                  |   | 2 | 3 | 4 |

|                |                                                           |             |          |   |   |   |   |
|----------------|-----------------------------------------------------------|-------------|----------|---|---|---|---|
| <i>IGLL1</i>   | Antibody deficiency, low KRECs                            |             |          |   | 2 | 3 | 4 |
| <i>IKBKB</i>   | CID/NBS+                                                  |             | SCID/CID |   | 2 | 3 | 4 |
| <i>IKBKG</i>   | CID/NBS+                                                  |             | SCID/CID |   |   | 3 | 4 |
| <i>IKZF1</i>   | SCID and T cell defects                                   |             | SCID/CID | 1 | 2 | 3 | 4 |
| <i>IL21</i>    | Antibody deficiency, low KRECs                            |             |          |   |   |   | 4 |
| <i>IL2RB</i>   | SCID and T cell defects                                   |             |          |   |   | 3 | 4 |
| <i>IL2RG</i>   | SCID and T cell defects                                   |             | SCID/CID | 1 | 2 | 3 | 4 |
| <i>IL7R</i>    | SCID and T cell defects                                   |             | SCID/CID | 1 | 2 | 3 | 4 |
| <i>IVD</i>     | small panel IEM                                           | Core US NBS | IVA      | 1 | 2 | 3 | 4 |
| <i>JAK3</i>    | SCID and T cell defects                                   |             | SCID/CID | 1 | 2 | 3 | 4 |
| <i>KRAS</i>    | CID/NBS+                                                  |             | SCID/CID |   |   | 3 | 4 |
| <i>LAT</i>     | SCID and T cell defects                                   |             | SCID/CID | 1 | 2 | 3 | 4 |
| <i>LCK</i>     | CID/NBS+                                                  |             | SCID/CID |   | 2 | 3 | 4 |
| <i>LCRB</i>    | Core US NBS genes,                                        | Core US NBS |          |   | 2 |   | 4 |
| <i>LIG1</i>    | Low T cells                                               |             |          |   |   |   | 4 |
| <i>LIG4</i>    | SCID and T cell defects                                   |             | SCID/CID | 1 | 2 | 3 | 4 |
| <i>LMBRD1</i>  | IEM+                                                      |             | MMA      | 1 | 2 | 3 | 4 |
| <i>LRRC8A</i>  | Antibody deficiency, low KRECs                            |             |          |   | 2 | 3 | 4 |
| <i>LYST</i>    | CID/NBS+                                                  |             | SCID/CID |   | 2 | 3 | 4 |
| <i>MAGT1</i>   | Low T cells                                               |             |          |   |   |   | 4 |
| <i>MAP3K14</i> | Antibody deficiency, low KRECs                            |             |          |   |   |   | 4 |
| <i>MAT1A</i>   | IEM                                                       |             |          |   | 2 | 3 | 4 |
| <i>MC2R</i>    | small panel IEM                                           |             | CAH      |   | 2 | 3 | 4 |
| <i>MCCC1</i>   | Core US NBS genes                                         | Core US NBS |          |   | 2 | 3 | 4 |
| <i>MCCC2</i>   | Core US NBS genes                                         | Core US NBS |          |   | 2 | 3 | 4 |
| <i>MMAA</i>    | small panel IEM                                           | Core US NBS | MMA      | 1 | 2 | 3 | 4 |
| <i>MMAB</i>    | small panel IEM                                           | Core US NBS | MMA      | 1 | 2 | 3 | 4 |
| <i>MMACHC</i>  | small panel IEM                                           |             | MMA/HCY  | 1 | 2 | 3 | 4 |
| <i>MMADHC</i>  | small panel IEM                                           |             | MMA/HCY  | 1 | 2 | 3 | 4 |
| <i>MMUT</i>    | small panel IEM                                           | Core US NBS | MMA      | 1 | 2 | 3 | 4 |
| <i>MTHFD1</i>  | Low T cells                                               |             |          |   |   |   | 4 |
| <i>MTHFR</i>   | IEM (large gene)                                          |             |          |   | 2 | 3 | 4 |
| <i>MTR</i>     | IEM (large gene)                                          |             | HCY      | 1 | 2 | 3 | 4 |
| <i>MTRR</i>    | IEM (large gene)                                          |             |          |   | 2 | 3 | 4 |
| <i>NADK2</i>   | IEM                                                       |             |          |   | 2 | 3 | 4 |
| <i>NAGLU</i>   | IEM+                                                      |             |          |   |   |   | 4 |
| <i>NAGS</i>    | IEM+                                                      |             |          |   | 2 | 3 | 4 |
| <i>NBN</i>     | CID/NBS+                                                  |             | SCID/CID |   | 2 | 3 | 4 |
| <i>NFKB2</i>   | Antibody deficiency, low KRECs                            |             |          |   |   |   | 4 |
| <i>NHEJ1</i>   | SCID and T cell defects                                   |             | SCID/CID | 1 | 2 | 3 | 4 |
| <i>NKX2-1</i>  | congenital hypothyreosis (AD),<br>and differential CF/CID |             | CH       |   |   | 3 | 4 |
| <i>NPC1</i>    | Lysosomal                                                 |             |          |   | 2 | 3 | 4 |
| <i>NPC2</i>    | Lysosomal                                                 |             |          |   | 2 | 3 | 4 |
| <i>NRAS</i>    | CID/NBS+                                                  |             | SCID/CID |   |   | 3 | 4 |
| <i>OTC</i>     | IEM+                                                      |             |          |   | 2 | 3 | 4 |
| <i>PAH</i>     | small panel IEM                                           | Core US NBS | PKU      | 1 | 2 | 3 | 4 |
| <i>PAX1</i>    | SCID and T cell defects                                   |             | SCID/CID | 1 | 2 | 3 | 4 |
| <i>PCBD1</i>   | IEM+                                                      |             |          |   | 2 | 3 | 4 |
| <i>PCCA</i>    | small panel IEM                                           | Core US NBS | PA       | 1 | 2 | 3 | 4 |
| <i>PCCB</i>    | small panel IEM                                           | Core US NBS | PA       | 1 | 2 | 3 | 4 |

|                         |                                |             |              |   |   |   |   |
|-------------------------|--------------------------------|-------------|--------------|---|---|---|---|
| <i>PGM3</i>             | SCID and IEM                   |             | SCID and IEM | 1 | 2 | 3 | 4 |
| <i>PHGDH</i>            | IEM+                           |             |              |   | 2 | 3 | 4 |
| <i>PIK3CD</i>           | SCID and IEM                   |             | SCID and IEM | 1 | 2 | 3 | 4 |
| <i>PIK3R1</i>           | Antibody deficiency, low KRECs |             |              |   | 2 | 3 | 4 |
| <i>PLPBP</i>            | IEM+                           |             |              |   |   |   | 4 |
| <i>PNP</i>              | SCID and IEM                   |             | SCID and IEM | 1 | 2 | 3 | 4 |
| <i>PNPO</i>             | IEM+                           |             |              |   |   |   | 4 |
| <i>POR</i>              | CAH                            |             | CAH          | 1 | 2 | 3 | 4 |
| <i>PRKDC</i>            | CID/NBS+                       |             | SCID/CID     |   | 2 | 3 | 4 |
| <i>PSAP</i>             | Lysosomal                      |             |              |   | 2 | 3 | 4 |
| <i>PSAT1</i>            | IEM+                           |             |              |   | 2 | 3 | 4 |
| <i>PSPH</i>             | IEM+                           |             |              |   | 2 | 3 | 4 |
| <i>PTPRC (=CD45)</i>    | CID/NBS+                       |             | SCID/CID     |   | 2 | 3 | 4 |
| <i>PTS</i>              | IEM+                           |             |              |   | 2 | 3 | 4 |
| <i>QDPR</i>             | IEM+                           |             |              |   | 2 | 3 | 4 |
| <i>RAC2</i>             | CID/NBS+                       |             | SCID/CID     | 1 | 2 | 3 | 4 |
| <i>RAG1</i>             | SCID and T cell defects        |             | SCID/CID     | 1 | 2 | 3 | 4 |
| <i>RAG2</i>             | SCID and T cell defects        |             | SCID/CID     | 1 | 2 | 3 | 4 |
| <i>RECQL4</i>           | SCID and T cell defects        |             | SCID/CID     | 1 | 2 | 3 | 4 |
| <i>RLTPR (=CARMIL2)</i> | CID/NBS+                       |             | SCID/CID     |   | 2 | 3 | 4 |
| <i>RMRP</i>             | SCID and T cell defects        |             | SCID/CID     | 1 | 2 | 3 | 4 |
| <i>SBDS</i>             | SCID and T cell defects        |             | SCID/CID     | 1 | 2 | 3 | 4 |
| <i>SLC16A1</i>          | IEM+                           |             |              |   | 2 | 3 | 4 |
| <i>SLC22A5</i>          | small panel IEM                | Core US NBS | CUD          | 1 | 2 | 3 | 4 |
| <i>SLC25A13</i>         | IEM                            |             |              |   | 2 | 3 | 4 |
| <i>SLC25A15</i>         | IEM+                           |             |              |   | 2 | 3 | 4 |
| <i>SLC25A20</i>         | small panel IEM                |             | CACT         | 1 | 2 | 3 | 4 |
| <i>SLC46A1</i>          | SCID and T cell defects        |             | SCID/CID     | 1 | 2 | 3 | 4 |
| <i>SLC52A2</i>          | IEM+                           |             |              |   | 2 | 3 | 4 |
| <i>SLC52A3</i>          | IEM+                           |             |              |   | 2 | 3 | 4 |
| <i>SLC6A8</i>           | IEM+                           |             |              |   | 2 | 3 | 4 |
| <i>SMARCAL1</i>         | CID/NBS+                       |             | SCID/CID     |   | 2 | 3 | 4 |
| <i>SMN1</i>             | Core US NBS genes              | Core US NBS |              | 1 | 2 |   | 4 |
| <i>SMN2</i>             | Core US NBS genes              | Core US NBS |              |   | 2 |   | 4 |
| <i>SPINK5</i>           | SCID and T cell defects        |             | SCID/CID     |   | 2 | 3 | 4 |
| <i>STAT5B</i>           | SCID and T cell defects        |             | SCID/CID     | 1 | 2 | 3 | 4 |
| <i>STIM1</i>            | SCID and T cell defects        |             | SCID/CID     | 1 | 2 | 3 | 4 |
| <i>TAT</i>              | IEM+                           |             |              |   | 2 | 3 | 4 |
| <i>TBX1</i>             | SCID and T cell defects        |             | SCID/CID     | 1 | 2 | 3 | 4 |
| <i>TCF3</i>             | Antibody deficiency, low KRECs |             |              |   | 2 |   | 4 |
| <i>TP63</i>             | CID/NBS+                       |             | SCID/CID     |   | 2 | 3 | 4 |
| <i>TPP1</i>             | IEM+                           |             |              |   |   |   | 4 |
| <i>TRNT1</i>            | Antibody deficiency, low KRECs |             |              |   |   |   | 4 |
| <i>TTC7A</i>            | SCID and T cell defects        |             | SCID/CID     | 1 | 2 | 3 | 4 |
| <i>UNC119</i>           | SCID and T cell defects        |             | SCID/CID     | 1 | 2 | 3 | 4 |
| <i>WAS</i>              | CID/NBS+                       |             |              |   | 2 | 3 | 4 |
| <i>ZAP70</i>            | SCID and T cell defects        |             | SCID/CID     | 1 | 2 | 3 | 4 |
| <i>ZBTB24</i>           | SCID and T cell defects        |             | SCID/CID     | 1 | 2 | 3 | 4 |
| <i>SLC5A5</i>           | Congenital hypothyreosis       |             | CH           |   |   | 3 | 4 |
| <i>TG</i>               | Congenital hypothyreosis       |             | CH           |   |   | 3 | 4 |
| <i>NKX2-5</i>           | Congenital hypothyreosis       |             | CH           |   |   | 3 | 4 |
| <i>THRA</i>             | Congenital hypothyreosis       |             | CH           |   |   | 3 | 4 |

|                     |                          |  |    |  |  |   |   |
|---------------------|--------------------------|--|----|--|--|---|---|
| <i>PAX8</i>         | Congenital hypothyreosis |  | CH |  |  | 3 | 4 |
| <i>TSHR</i>         | Congenital hypothyreosis |  | CH |  |  | 3 | 4 |
| <i>DUOXA2</i>       | Congenital hypothyreosis |  | CH |  |  | 3 | 4 |
| <i>IYD</i>          | Congenital hypothyreosis |  | CH |  |  | 3 | 4 |
| <i>TSHB</i>         | Congenital hypothyreosis |  | CH |  |  | 3 | 4 |
| <i>PROP1</i>        | Congenital hypothyreosis |  | CH |  |  | 3 | 4 |
| <i>TPO</i>          | Congenital hypothyreosis |  | CH |  |  | 3 | 4 |
| <i>SLC26A4</i>      | Congenital hypothyreosis |  | CH |  |  | 3 | 4 |
| <i>POU1F1</i>       | Congenital hypothyreosis |  | CH |  |  | 3 | 4 |
| <i>IGSF1</i>        | Congenital hypothyreosis |  | CH |  |  | 3 | 4 |
| <i>CDCA8</i>        | Congenital hypothyreosis |  | CH |  |  | 3 | 4 |
| <i>NTN1</i>         | Congenital hypothyreosis |  | CH |  |  | 3 | 4 |
| <i>UBR1</i>         | Congenital hypothyreosis |  | CH |  |  | 3 | 4 |
| <i>JAG1</i>         | Congenital hypothyreosis |  | CH |  |  | 3 | 4 |
| <i>DUOX2</i>        | Congenital hypothyreosis |  | CH |  |  | 3 | 4 |
| <i>FOXE1 (TTF2)</i> | Congenital hypothyreosis |  | CH |  |  | 3 | 4 |
| <i>GLIS3</i>        | Congenital hypothyreosis |  | CH |  |  | 3 | 4 |
